# Supplementary material for: PARP-1 Is Critical for Recruitment of Dendritic Cells to the Lung in a Mouse Model of Asthma but Dispensable for Their Differentiation and Function
Source: PubMed Central journal article supplement (PMC6507252; doi:10.1155/2019/1656484), 2019-04-24

**Supplementary Table 1.** Primers sets for the different genes amplified by PCR.

|                 | Forward primer                | Reverse primer                |
|-----------------|-------------------------------|-------------------------------|
| <i>hPARP1</i>   | 5'-GGAAGCTGGAGGAGTGACAG-3'    | 5'-ACACCCCTTGCACGTACTIONTC-3' |
| <i>hiNOS</i>    | 5'-TCCTACACCACACCAAAC-3'      | 5'-CTCCAATCTCTGCCTATCC-3'     |
| <i>hGAPDH</i>   | 5'-TCCCTGAGCTGAACGGGAAG-3'    | 5'-GGAGGAGTGGGTGTCGCTGT-3'    |
| <i>mVCAM-1</i>  | 5'-AGTTGGGGATTTCGGTTGTTCT-3'  | 5'-CCCCTCATTCCCTTACCACCC-3'   |
| <i>mβ-actin</i> | 5'-ACCGTGAAAAGATGACCCAGATC-3' | 5'-TAGTTTTCATGGATGCCACAGG-3'  |

**Supplementary Fig. S1.** Gating strategy for DC identification and phenotyping.

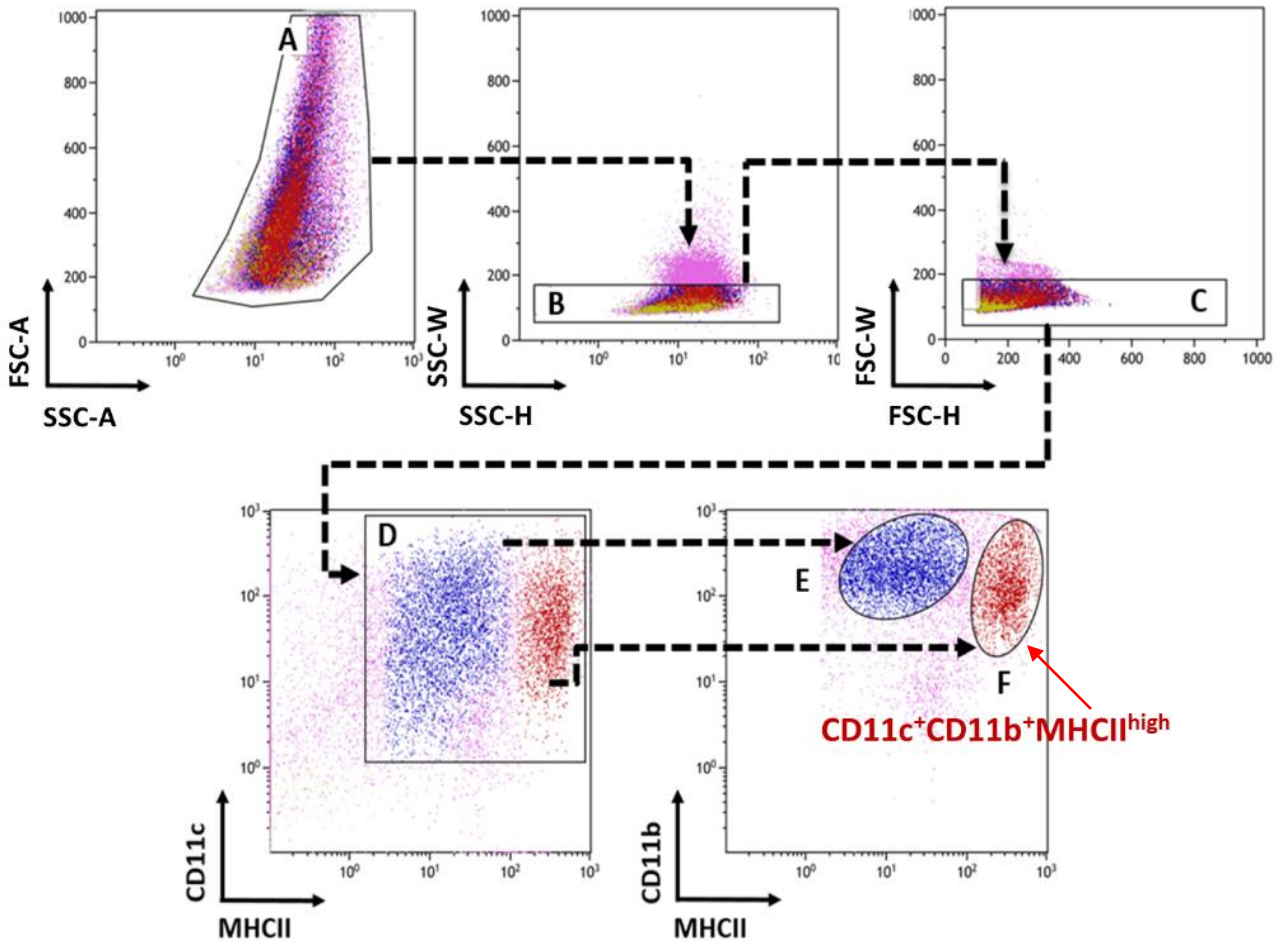

**Supplementary Fig. S2.** Gating strategy and representative histograms pertinent to the determination of T cell proliferation.

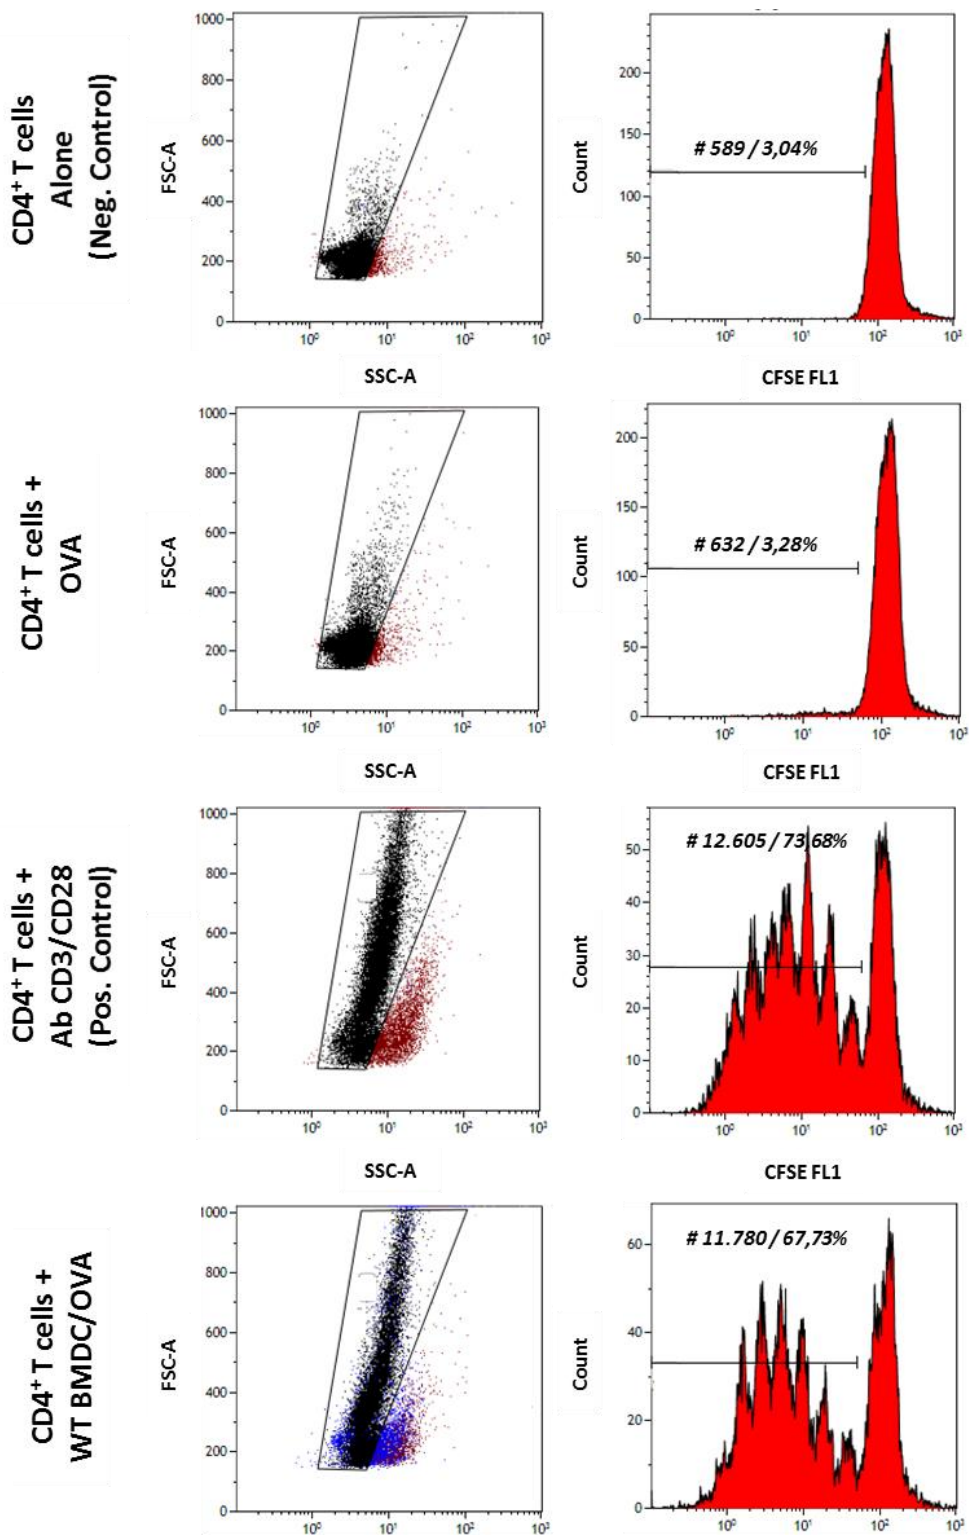

**Supplementary Fig. S3.** Representative dot plots for the data displayed in Fig. 2.

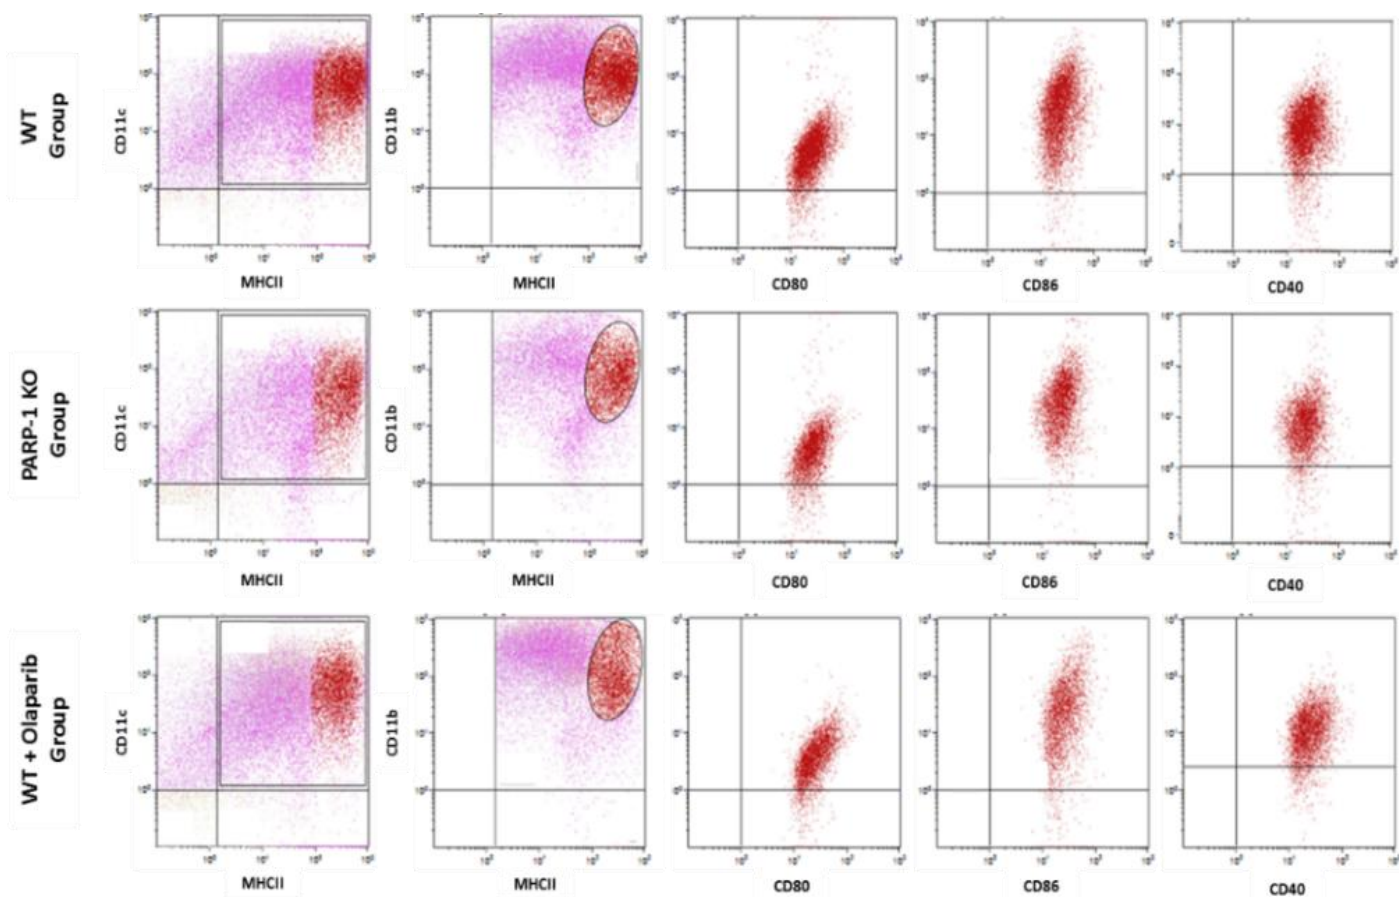

**Supplementary Fig. S4.** Percent of CD11b<sup>+</sup>/CD11c<sup>+</sup>/MHCII<sup>interm</sup> cells in the different experimental groups; this is related to results displayed in Fig.2B and 2C.

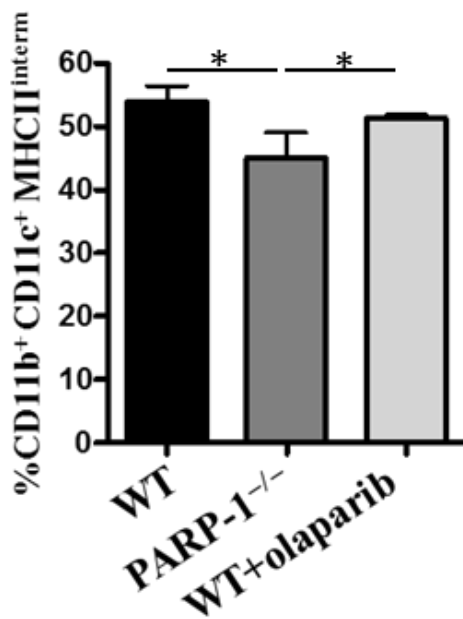

Supplement: 1656484.f1.pdf [file 1656484.f1.pdf]
